# Supplementary material
Source: ML conference proceedings conference paper supplement (https://openreview.net/forum?id=jrddoq9NDP6)
Supplement: supplementary_material [file attachment]

## 1 Supplementary Material

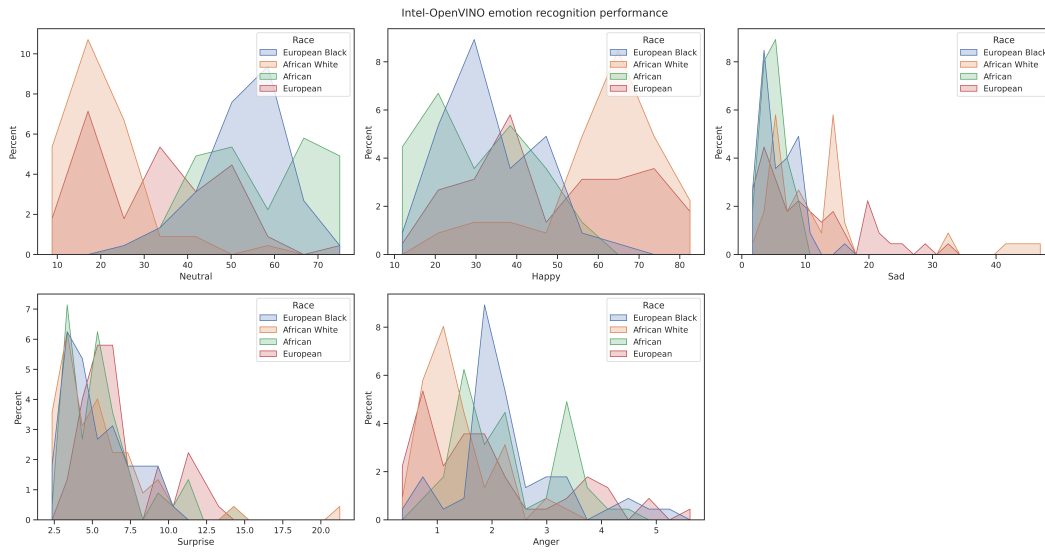

Figure 1: Intel OpenVINO performance over the synthetic face dataset and their emotion probability evaluations.
